# Supplementary material for: Toward harmonized phenotyping of human myeloid-derived suppressor cells by flow cytometry: results from an interim study
Source: Springer Nature journal article supplement (doi:10.1007/s00262-015-1782-5), 2016-01-04
Supplement: MOESM1 [file 8233142]

|                              |                | ANALYSIS WITHOUT DCM |       |        |      |        |       |                | ANALYSIS WITH DCM |       |        |      |        |       |
|------------------------------|----------------|----------------------|-------|--------|------|--------|-------|----------------|-------------------|-------|--------|------|--------|-------|
|                              |                | MEAN                 | SD    | %CV    | Q1   | MEDIAN | Q3    |                | MEAN              | SD    | %CV    | Q1   | MEDIAN | Q3    |
| <b>DONOR 1<br/>(HBC-480)</b> | <b>MDSC 1</b>  | 2,66                 | 4,86  | 182,62 | 0,08 | 0,31   | 2,24  | <b>MDSC 1</b>  | 2,13              | 4,69  | 219,60 | 0,03 | 0,07   | 1,77  |
|                              | <b>MDSC 2</b>  | 1,27                 | 3,21  | 253,49 | 0,02 | 0,07   | 0,46  | <b>MDSC 2</b>  | 2,17              | 6,76  | 311,68 | 0,01 | 0,03   | 0,11  |
|                              | <b>MDSC 3</b>  | 0,53                 | 0,43  | 81,90  | 0,09 | 0,54   | 0,91  | <b>MDSC 3</b>  | 0,42              | 0,43  | 102,11 | 0,04 | 0,20   | 0,78  |
|                              | <b>MDSC 4</b>  | 6,11                 | 5,22  | 85,46  | 3,41 | 4,67   | 7,65  | <b>MDSC 4</b>  | 5,43              | 4,06  | 74,81  | 3,22 | 4,52   | 7,34  |
|                              | <b>MDSC 5</b>  | 1,04                 | 2,80  | 268,88 | 0,12 | 0,24   | 0,47  | <b>MDSC 5</b>  | 2,62              | 9,62  | 366,88 | 0,04 | 0,14   | 0,27  |
|                              | <b>MDSC 6</b>  | 1,48                 | 3,08  | 208,41 | 0,13 | 0,27   | 0,38  | <b>MDSC 6</b>  | 3,97              | 16,44 | 414,37 | 0,08 | 0,14   | 0,26  |
|                              | <b>MDSC 7</b>  | 4,67                 | 3,98  | 85,22  | 1,98 | 3,60   | 5,68  | <b>MDSC 7</b>  | 4,82              | 3,69  | 76,68  | 2,41 | 4,08   | 6,16  |
|                              | <b>MDSC 8</b>  | 4,13                 | 11,62 | 281,45 | 0,05 | 0,31   | 1,62  | <b>MDSC 8</b>  | 4,15              | 13,70 | 330,41 | 0,04 | 0,12   | 0,59  |
|                              | <b>MDSC 9</b>  | 2,35                 | 2,39  | 101,58 | 0,83 | 1,23   | 3,52  | <b>MDSC 9</b>  | 3,94              | 7,26  | 184,32 | 0,93 | 1,31   | 3,97  |
|                              | <b>MDSC 10</b> | 1,74                 | 3,54  | 204,17 | 0,51 | 0,91   | 1,43  | <b>MDSC 10</b> | 3,24              | 8,28  | 255,84 | 0,38 | 0,92   | 1,57  |
| <b>DONOR 2<br/>(HBC-514)</b> | <b>MDSC 1</b>  | 4,12                 | 8,27  | 200,75 | 0,08 | 0,44   | 3,95  | <b>MDSC 1</b>  | 3,34              | 8,20  | 245,75 | 0,04 | 0,11   | 1,83  |
|                              | <b>MDSC 2</b>  | 1,61                 | 4,95  | 307,29 | 0,01 | 0,10   | 0,39  | <b>MDSC 2</b>  | 1,37              | 5,13  | 375,14 | 0,00 | 0,02   | 0,12  |
|                              | <b>MDSC 3</b>  | 0,81                 | 0,92  | 113,94 | 0,06 | 0,37   | 1,33  | <b>MDSC 3</b>  | 0,59              | 0,68  | 114,77 | 0,03 | 0,22   | 1,32  |
|                              | <b>MDSC 4</b>  | 11,61                | 7,57  | 65,22  | 5,89 | 12,06  | 16,38 | <b>MDSC 4</b>  | 10,72             | 6,88  | 64,13  | 5,65 | 9,81   | 14,53 |
|                              | <b>MDSC 5</b>  | 0,77                 | 2,28  | 296,86 | 0,04 | 0,12   | 0,23  | <b>MDSC 5</b>  | 0,63              | 1,99  | 314,50 | 0,02 | 0,06   | 0,14  |
|                              | <b>MDSC 6</b>  | 0,86                 | 1,95  | 227,00 | 0,04 | 0,12   | 0,20  | <b>MDSC 6</b>  | 0,37              | 0,91  | 246,77 | 0,02 | 0,04   | 0,12  |
|                              | <b>MDSC 7</b>  | 9,35                 | 7,13  | 76,28  | 3,57 | 9,17   | 11,91 | <b>MDSC 7</b>  | 9,92              | 7,78  | 78,49  | 3,58 | 8,82   | 13,08 |
|                              | <b>MDSC 8</b>  | 3,03                 | 9,17  | 302,59 | 0,03 | 0,12   | 1,16  | <b>MDSC 8</b>  | 1,08              | 2,64  | 245,05 | 0,02 | 0,04   | 0,14  |
|                              | <b>MDSC 9</b>  | 2,98                 | 3,07  | 103,00 | 0,82 | 1,76   | 4,44  | <b>MDSC 9</b>  | 3,31              | 3,09  | 93,54  | 1,09 | 2,06   | 5,26  |
|                              | <b>MDSC 10</b> | 2,43                 | 3,87  | 159,45 | 0,55 | 1,42   | 2,22  | <b>MDSC 10</b> | 1,85              | 3,17  | 170,91 | 0,32 | 1,03   | 1,63  |
| <b>DONOR 3<br/>(L29_3)</b>   | <b>MDSC 1</b>  | 3,59                 | 7,16  | 199,34 | 0,08 | 0,68   | 2,46  | <b>MDSC 1</b>  | 2,80              | 6,70  | 238,90 | 0,04 | 0,10   | 2,28  |
|                              | <b>MDSC 2</b>  | 1,41                 | 3,80  | 269,61 | 0,04 | 0,12   | 0,34  | <b>MDSC 2</b>  | 1,09              | 3,51  | 321,70 | 0,01 | 0,03   | 0,12  |
|                              | <b>MDSC 3</b>  | 1,45                 | 1,39  | 96,09  | 0,17 | 1,21   | 2,44  | <b>MDSC 3</b>  | 1,21              | 1,35  | 111,98 | 0,06 | 0,36   | 2,22  |
|                              | <b>MDSC 4</b>  | 11,50                | 6,63  | 57,65  | 5,72 | 11,95  | 17,92 | <b>MDSC 4</b>  | 10,94             | 6,49  | 59,30  | 6,14 | 11,59  | 15,62 |
|                              | <b>MDSC 5</b>  | 1,19                 | 2,77  | 232,94 | 0,15 | 0,48   | 0,69  | <b>MDSC 5</b>  | 0,52              | 1,02  | 195,91 | 0,11 | 0,19   | 0,43  |
|                              | <b>MDSC 6</b>  | 1,78                 | 3,62  | 202,99 | 0,20 | 0,41   | 1,08  | <b>MDSC 6</b>  | 0,73              | 1,82  | 247,01 | 0,07 | 0,13   | 0,43  |
|                              | <b>MDSC 7</b>  | 10,53                | 7,89  | 75,00  | 2,66 | 8,98   | 16,84 | <b>MDSC 7</b>  | 10,55             | 7,81  | 73,99  | 2,78 | 10,12  | 15,87 |
|                              | <b>MDSC 8</b>  | 3,25                 | 7,15  | 219,80 | 0,15 | 0,37   | 2,59  | <b>MDSC 8</b>  | 1,55              | 3,40  | 218,47 | 0,06 | 0,16   | 0,44  |
|                              | <b>MDSC 9</b>  | 3,07                 | 2,84  | 92,53  | 0,87 | 1,54   | 5,62  | <b>MDSC 9</b>  | 3,27              | 2,76  | 84,59  | 0,91 | 1,50   | 6,14  |
|                              | <b>MDSC 10</b> | 3,05                 | 4,70  | 154,07 | 0,60 | 1,85   | 3,36  | <b>MDSC 10</b> | 2,64              | 3,82  | 144,49 | 0,38 | 1,77   | 3,11  |

Supplementary Table 1

Descriptive statistics of the frequencies of ten MDSC subsets normalized on the count of lymphocytes + monocytes and identified either in presence or absence of DCM. For each donor and each myeloid subset, mean, standard deviation (SD), first and third quartile (Q1 and Q3, respectively) and median values are shown. Results produced in the same laboratory using either one 8-color panel or three 4-color panels were considered as independent values leading to 26 measurements for each subset. n=23 evaluable laboratories for analysis in the absence of dead cell marker, n=24 evaluable laboratories for analysis considering the dead cell marker. Evaluable laboratories were those that reported all requested data points.
